# Supplementary material for: Dendritic cell immunoreceptor drives atopic dermatitis by modulating oxidized CaMKII-involved mast cell activation
Source: PubMed Central journal article supplement (PMC8983143; doi:10.1172/jci.insight.152559), 2022-03-08

## Supplementary Materials

### Dendritic Cell Immunoreceptor Drives Atopic Dermatitis by Modulating Oxidized CaMKII-Involved Mast Cell Activation

Xiaoyan Luo<sup>1,2†</sup>, Jingsi Chen<sup>1,2†</sup>, Huan Yang<sup>1,2†</sup>, Xinyue Hu<sup>1,3</sup>, Martin P Alphonse<sup>4</sup>, Yingchun Shen<sup>1</sup>,  
Yuko Kawakami<sup>5</sup>, Xiaoying Zhou<sup>2</sup>, Wei Tu<sup>1</sup>, Toshiaki Kawakami<sup>5,6</sup>, Mei Wan<sup>7</sup>,  
Nathan Archer<sup>4</sup>, Hua Wang<sup>2\*</sup>, Peisong Gao<sup>1\*</sup>

<sup>1</sup>Division of Allergy and Clinical Immunology, Johns Hopkins University School of Medicine;  
Baltimore, MD 21224, USA

<sup>2</sup>Pediatric Dermatology, Children's Hospital, Chongqing Medical University; Chongqing 400014, China

<sup>3</sup>Department of Respiratory Medicine, Xiangya Hospital, Central South University; Changsha, Hunan  
410008, China

<sup>4</sup>Department of Dermatology, Johns Hopkins University School of Medicine; Baltimore, MD 21231,  
USA

<sup>5</sup>Division of Cell Biology, La Jolla Institute for Allergy and Immunology; La Jolla, CA 92037, USA

<sup>6</sup>Department of Dermatology, School of Medicine, University of California San Diego; La Jolla, CA  
92093, USA

<sup>7</sup>Department of Orthopaedic Surgery, Johns Hopkins University School of Medicine, Baltimore,  
Maryland, USA

†These authors contributed equally to this work

## 25 **METHODS**

### 26 **Knockdown of human DCIR**

27 LAD2, an immortalized human mast cell line (Gift from NIH), was cultured in StemPro-34 serum-free  
28 media (Gibco) supplemented with penicillin (50 IU/ml), streptomycin (50 µg/ml), L-glutamine (2 mM),  
29 and recombinant human stem cell factor (100 ng/ml). DCIR knockdown was performed by using a pre-  
30 designed Mission siRNA pair. The siRNA transfection was carried out using Lipofectamine™  
31 RNAiMAX (ThermoFisher) according to the manufacturer's instructions.

32

### 33 **FACS analysis**

34 Flow cytometry was performed as described earlier (1). In brief, 10-mm skin punch biopsies were  
35 collected, minced and enzymatically digested in 3 mL RPMI containing 100 µg/mL DNaseI (Sigma-  
36 Aldrich) and 1.67 Wunsch U/ml Liberase TL (Roche) for 1 hour at 37°C and shaken at 140 rpm. Single-  
37 cell suspensions were obtained after filtering the digested samples through a 40-µm cell filter using a 3  
38 mL syringe plunger and cells were then washed in RPMI. The single-cell suspension was incubated with  
39 TruStain fcX (Biolegend) to block Fc receptor binding and resuspended to label with mAbs against cell  
40 surface markers. The cell surface markers included CD45, Lineage marker, cKit (CD117), KLRG1,  
41 CD127, CD11b, CD3, CD4, CD8, gdTCR, and FcεRI, in Hanks Balanced Salt Solution (HBSS) with  
42 2% Calf Serum and 5mM Hepes along with Brilliant Stain Buffer (BD Biosciences). The cells were  
43 washed with PBS and stained for viability (Zombie Aqua Fixable Viability Kit – BioLegend). The  
44 surface labeled cells were fixed in the BD Cytofix/ Cytoperm Buffer kit (BD Biosciences). The cells  
45 were further labeled for intracellular cytokines, including IFNγ, TNF, IL-17, and IL-4. Respective IgG  
46 isotype control for Lineage marker controls were performed in the experiment. The mAb-labeled cells  
47 were then washed in intracellular staining buffer and resuspended in Stabilizing Fixative (BD  
48 Biosciences). Cell acquisition was performed on the BD LSRFortessa flow cytometer (BD Biosciences)

49 and data were analyzed using FlowJo software (v10). For immunophenotyping of ILC2, cells were first  
50 gated on live cells, singlets and CD45<sup>+</sup>, Lin<sup>-</sup> populations, and further gated on KLRG1<sup>+</sup>CD127<sup>+</sup>CD25<sup>+</sup>  
51 cells. For identification of Th1 (IFN $\gamma$ <sup>+</sup>), Th2 (IL-4<sup>+</sup>) and Th17 (IL-17<sup>+</sup>) population, cells were over-laid  
52 with expression of CD4<sup>+</sup> T-cells (CD45<sup>+</sup>CD3<sup>+</sup>CD4<sup>+</sup>CD8<sup>-</sup>gdTCR<sup>-</sup>), CD8<sup>+</sup> T-cells (CD45<sup>+</sup>CD3<sup>+</sup>CD8<sup>+</sup>),  
53 and  $\gamma\delta$ -T-cells (CD45<sup>+</sup>CD3<sup>+</sup>CD8<sup>-</sup>gdTCR<sup>+</sup>).

54

## 55 **ELISA**

56 Levels of cytokines in serum were quantified by using the Ready-Set-Go! ELISA sets (ThermoFisher)  
57 (2). Cockroach allergen-specific IgE and IgG1 serum levels were analyzed by ELISA as previously  
58 described (3). Briefly, 96-well flat-bottom plate (Costar, Columbia, MD, USA) was coated with allergen  
59 (10 $\mu$ g/ml) in PBS overnight at 4°C and blocked with 5% BSA in TBST for 1 h at room temperature.  
60 Serum was diluted at 1:1000 in PBS for IgG1 detection or treated with rec-Protein G-Sepharose 4B  
61 (ThermoFisher) for IgE detection. Serum samples were added and incubated overnight at 4°C. Serum  
62 IgE/IgG1 antibody was then measured using a biotinylated anti-mouse IgE/IgG1 (Biolegend), followed  
63 by an HRP-conjugated antibody to mouse IgE/IgG1. Absorption at 450 nm was measured with an iMark  
64 Microplate Absorbance Reader (BioRad).

65

66

67

68

69

70

71

72

73

74

75 **FIGURE LEGENDS**

76 **Fig. S1. Gating strategy for cell populations from skin tissues of AD mouse model. (A).**

77 Representative flow plot gating strategy for T-cells, including CD8<sup>+</sup> T-cells CD4<sup>+</sup> T-cells  
78 (CD45<sup>+</sup>CD3<sup>+</sup>CD4<sup>+</sup>CD8<sup>-</sup>gdTCR<sup>-</sup>), CD8<sup>+</sup> T-cells (CD45<sup>+</sup>CD3<sup>+</sup>CD8<sup>+</sup>),  $\gamma\delta$ -T-cells (CD45<sup>+</sup>CD3<sup>+</sup>CD8<sup>-</sup>  
79 gdTCR<sup>+</sup>), Th1 (IFN $\gamma$ <sup>+</sup>), Th2 (IL-2<sup>+</sup>), Th17 (IL-17<sup>+</sup>) T-cells, and mast cells (CD45<sup>+</sup>CD3<sup>-</sup>Fc $\epsilon$ RI<sup>+</sup>cKit<sup>+</sup>),  
80 respectively. **(B)** Representative flow plots for the ILC2 population (CD45<sup>+</sup>Lin<sup>-</sup>  
81 KLRG1<sup>+</sup>CD127<sup>+</sup>CD25<sup>+</sup>).

82 **Fig. S2: Increased mast cells and DCIR expression in the lesional skins of AD patients. (A-B)**

83 Representative hematoxylin and eosin (H&E, **A**) and Toluidine blue (**B**) staining of skin tissue sections  
84 (arrow, mast cell) of AD patients (AD, n=15) and healthy controls (HC, n=15). **(C-D)** Quantification of  
85 epidermal thickness (**C**,  $\mu$ m) in **(A)** and positive staining (**D**) in **(B)** for Toluidine blue. n=10/group. **(E)**  
86 RT-PCR analysis of DCIR expression in the skin tissues of AD patients and controls (n=8). Data were  
87 compared using a two-tailed Student's t-test. \*\*\* $P < 0.001$ .

88 **Fig. S3. Cockroach allergen-induced skin inflammation is independent of IgE. (A)** Serum levels of  
89 specific IgE and IgG1 to PBS or CRE of WT and IgE knockout mice (IgE KO) mice exposed to PBS or  
90 CRE. **(B)** Representative hematoxylin and eosin (H&E) staining and epidermal thickness ( $\mu$ m) of skin  
91 tissues of WT and IgE knockout mice (IgE KO) mice exposed to PBS or CRE. **(C)** Quantitative RT-PCR  
92 analysis of IL-4 and IL-13 expression in the skin tissues of PBS or CRE-treated mice. **(D)** Serum levels  
93 of IL-4 as assessed by ELISA. n=2-7. Data represent mean  $\pm$  SEM. Data were compared by using 2-way  
94 ANOVA. \*\* $P < 0.01$ , \*\*\* $P < 0.001$ .

95 **Fig. S4. DCIR expression in skin mast cells of the AD mouse model. (A)** Representative

96 immunofluorescence images of dorsal skin sections and fluorescence analysis of DCIR staining in the  
97 epidermis of PBS and CRE-treated WT or *Kit*<sup>W-sh/W-sh</sup> mice. **(B)** Quantification analysis of  
98 DCIR<sup>+</sup>tryptase<sup>+</sup> cells in the lesion skin. n=8/group **(C)** qRT-PCR analysis of DCIR expression in the skin

99 tissues. n=3/group. Data represent mean  $\pm$  SEM. Comparisons were made by using 2-way ANOVA.  
100 **\*\*P <0.01, \*\*\*P <0.001.**

101 **Fig. S5. DCIR regulates OVA-induced mast cell activation.** (A) DCIR knockdown by siRNA was  
102 confirmed by RT-PCR. (B-D) LAD2 with or without DCIR knockdown were sensitized with 1 ug/mL  
103 anti-OVA IgE (E-C1) for 16 hours and then stimulated with 10 ug/mL OVA for 30 minutes in Tyrode's  
104 buffer. Mast cell activation was assessed by measuring the expression of LAMP-1 (B) by flow  
105 cytometry, and  $\beta$ -hexosaminidase (C) and cytokine levels (D) in supernatants by ELISA. n=3-6/group.  
106 Data represent mean  $\pm$  SEM. Data were compared using a two-tailed Student's t-test. \*P <0.05, \*\*\*P  
107 <0.001.

108 **Fig. S6. DCIR regulates IgE-mediated allergic reactions.** (A) Scheme of experimental protocol for  
109 IgE-mediated anaphylaxis. (A) Representative images of Evans blue-stained extravasation into ear skin  
110 of CRE-treated WT and DCIR<sup>-/-</sup> mice and quantification of the extravasation of Evans blue leakage into  
111 the skin. n=6/group. (B) Representative Toluidine blue staining and quantification of cells with positive  
112 staining for Toluidine blue of skin tissue sections of CRE-treated WT and DCIR<sup>-/-</sup> mice. n=6/group. Data  
113 represent mean  $\pm$  SEM. Comparisons were made using a two-tailed Student's t-test of PBS or CRE-  
114 treated WT vs. DCIR<sup>-/-</sup> mice. \*P <0.05, \*\*\*P <0.001.

115 **Fig. S7. CaMKII kinase activity translocation reporter (CaMKII-KTR).** (A) Schematic of the  
116 CaMKII-KTR. The N-terminus of the KTR is a well-characterized CaMKII-interacting domain from  
117 HDAC4 (AA582-62451), followed by a nuclear localization signal (NLS) and a nuclear exporting signal  
118 (NES). The high affinity CaMKII substrate consensus sequence (LXRXXSV) was built into both the  
119 NLS and NES. The C-terminus of the CaMKII-KTR is an enhanced green fluorescent protein (EGFP).  
120 (B) The KTR shuttles between the nucleus and cytosol. Phosphorylation by CaMKII decreases the  
121 strength of the NLS while increases the strength of the NES, resulting in a net translocation of the KTR  
122 into the cytosol. The ratio between the cytosolic and nuclear signals of the KTR corresponds to the

123 overall activity of CaMKII inside the cells.

124

125

126

127

128

129

130

131

132

133

134

135

136

137

138

139

140

141

142

143

144

145

146

147

148

149

150

151

152

153

154

155

156

157

158

159

160

161

162

163

164

165

166

167

168  
169  
170

**Table S1. Clinical and demographic data of AD patients and healthy control subjects**

| <b>Group</b>       | <b>n</b> | <b>Age (y)</b> | <b>Sex (Male:<br/>Female)</b> | <b>SCORAD</b> | <b>Serum IgE<br/>(IU/ml)</b> | <b>Personal or Family<br/>History of Allergic<br/>Diseases</b> |
|--------------------|----------|----------------|-------------------------------|---------------|------------------------------|----------------------------------------------------------------|
| AD                 | 15       | 6.8±2.8        | 9:6                           | 52.9±16.1     | 426.5±289.8                  | 9/15                                                           |
| Healthy<br>Control | 15       | 6.2±3.2        | 10:5                          | –             | –                            | 2/15                                                           |

176  
177  
178  
179  
180  
181  
182  
183  
184  
185  
186  
187  
188  
189  
190  
191  
192  
193

194 **TABLE S2. Raw data of epidermal thickness and Mast cell number**

| <i>Group</i> | <i>Sex</i> | <i>Age (y)</i> | <i>SCORAD</i> | <i>Serum IgE (IU/ml)</i> | <i>Biopsy site</i> | <i>Epidermal thickness (HE, <math>\mu</math>m)</i> | <i>Num. of MCs (TB, 40X)</i> |
|--------------|------------|----------------|---------------|--------------------------|--------------------|----------------------------------------------------|------------------------------|
| <i>HC</i>    |            |                |               |                          |                    |                                                    |                              |
| <i>1</i>     | M          | 8y1m           | 33.9          | 3.41                     | Right leg          | 116.97                                             | 12.5                         |
| <i>2</i>     | M          | 3y4m           | 31.6          | -                        | Left leg           | 277.31                                             | 9.5                          |
| <i>3</i>     | F          | 3y11m          | 28.8          | 118.6                    | Trunk              | 263.14                                             | 9                            |
| <i>4</i>     | M          | 9y1m           | 64.4          | 259                      | Left arm           | 158.31                                             | 10.6                         |
| <i>5</i>     | M          | 4y11m          | 50.8          | 58                       | Left thigh         | 292.39                                             | 9.4                          |
| <i>6</i>     | F          | 4y             | 35.1          | 679                      | Right leg          | 181.89                                             | 11.2                         |
| <i>7</i>     | M          | 10y            | 53.2          | 487                      | Left thigh         | 209.55                                             | 8.6                          |
| <i>8</i>     | F          | 10y6m          | 72.8          | 794                      | Right leg          | 162.8                                              | 11.2                         |
| <i>9</i>     | F          | 3y2m           | 41.2          | 768                      | Right forearm      | 188.8                                              | 9.8                          |
| <i>10</i>    | M          | 4y4m           | 58.6          | 401                      | Left thigh         | 107.78                                             | 9                            |
| <i>11</i>    | M          | 9y4m           | 67.7          | 647                      | Left thigh         | 157                                                | 5.8                          |
| <i>12</i>    | M          | 9y11m          | 60.5          | 686                      | Right leg          | 81.8                                               | 5                            |
| <i>13</i>    | F          | 5y11m          | 83.3          | 314                      | Left elbow         | 86.72                                              | 11.6                         |
| <i>14</i>    | F          | 5y3m           | 56.8          | 61                       | Left thigh         | 103                                                | 7                            |
| <i>15</i>    | M          | 9y10m          | 55            | 695                      | Abdomen            | 91.88                                              | 5.6                          |
| <i>AD</i>    |            |                |               |                          |                    |                                                    |                              |
| <i>1</i>     | M          | 3y6m           | -             | -                        | Abdomen            | 48.67                                              | 2                            |
| <i>2</i>     | M          | 3y1m           | -             | -                        | Abdomen            | 44.28                                              | 3                            |
| <i>3</i>     | M          | 1y7m           | -             | -                        | Abdomen            | 42.47                                              | 3.5                          |
| <i>4</i>     | M          | 5y             | -             | -                        | Abdomen            | 62.65                                              | 4.5                          |
| <i>5</i>     | M          | 6y             | -             | -                        | Abdomen            | 60.48                                              | 6                            |
| <i>6</i>     | M          | 5y             | -             | -                        | Abdomen            | 54                                                 | 1.5                          |
| <i>7</i>     | F          | 4y7m           | -             | -                        | Chest              | 41.2                                               | 4                            |
| <i>8</i>     | M          | 10y6m          | -             | -                        | Neck               | 31.44                                              | 3.2                          |
| <i>9</i>     | M          | 5y9m           | -             | -                        | Right arm          | 46.88                                              | 2.6                          |
| <i>10</i>    | F          | 10y9m          | -             | -                        | Left upper arm     | 103.47                                             | 4.4                          |
| <i>11</i>    | M          | 3y11m          | -             | -                        | back               | 62.93                                              | 4.3                          |
| <i>12</i>    | M          | 6y10m          | -             | -                        | Right upper arm    | 48.89                                              | 2.6                          |
| <i>13</i>    | F          | 4y5m           | -             | -                        | Right upper arm    | 57.76                                              | 4.4                          |
| <i>14</i>    | F          | 9y5m           | -             | -                        | Right shoulder     | 50.70                                              | 2.6                          |
| <i>15</i>    | F          | 12y8m          | -             | -                        | Right forearm      | 50.6                                               | 3.4                          |

195

196

197

198



**TABLE S3. A list of antibodies used for the flow cytometry analysis of skin immune cells**

| <b>Antigen</b>                   | <b>Clone</b> | <b>Fluorophore</b> | <b>Company</b> | <b>Product#</b> | <b>Host</b> |
|----------------------------------|--------------|--------------------|----------------|-----------------|-------------|
| <b>CD45</b>                      | 30-F11       | BUV563             | BD             | 565710          | Rat IgG     |
| <b>CD4</b>                       | GK1.5        | BUV496             | BD             | 564667          | Rat IgG     |
| <b>cKit (CD117)</b>              | 2B8          | BUV395             | BD             | 564011          | Rat IgG     |
| <b>CD11b</b>                     | M1/70        | BV786              | BD             | 740861          | Rat IgG     |
| <b>TNF<math>\alpha</math></b>    | MP6-XT22     | BV711              | Biologend      | 506349          | Rat IgG     |
| <b>F4/80</b>                     | T45-2342     | BV650              | BD             | 743282          | Rat IgG     |
| <b>gdTCR</b>                     | GL3          | BV605              | BD             | 744116          | Hamster IgG |
| <b>Siglec-F</b>                  | E50-2440     | BV421              | BD             | 562681          | Rat IgG2a   |
| <b>IL-4</b>                      | 11B11        | FITC/AF488         | Biologend      | 504111          | Rat IgG     |
| <b>IL-17A</b>                    | TC11-18H10.1 | PE-Cy7             | Biologend      | 506921          | Rat IgG     |
| <b>CD3</b>                       | 145-2C11     | PE-CF594           | BD             | 562332          | Hamster igG |
| <b>CD123</b>                     | 5B11         | PE                 | Biologend      | 106005          | Rat IgG2a   |
| <b>IFN<math>\gamma</math></b>    | XMG1.2       | APC-Cy7            | BD             | 561479          | Rat IgG     |
| <b>CD8</b>                       | 53-69.7      | AF700              | BD             | 557959          | Rat IgG     |
| <b>Fc<math>\epsilon</math>R1</b> | MAR-1        | AF647              | BioLegend      | 134309          | Hamster IgG |
| <b>CD127</b>                     | A7R34        | PE-Cy7             | Biologend      | 135013          | Rat IgG     |
| <b>Lineage marker</b>            | multi        | AF700              | Biologend      | 133313          | Multi       |
| <b>CD25</b>                      | PC61         | APC                | Biologend      | 102011          | Rat IgG     |

200

201

202

203

204

205

206

207

208 **Table S4. Primer sequences used for quantitative RT-PCR**

| Target                          | Primer sequence                         |     |
|---------------------------------|-----------------------------------------|-----|
| <b><math>\beta</math>-actin</b> | F: 5'-GCG CAA GTA CTC TGT GTG GA-3'     | 209 |
|                                 | R: 5'-GAA AGG GTG TAA AAC GCA GC-3'     | 210 |
| <b>Dcir</b>                     | F: 5'-GAC TCG TCT TCA TGT ACC GTC T-3'  | 211 |
|                                 | R: 5'-AGC AAC AGA GAA TAA GAT TGC CA-3' | 213 |
| <b>IL-4</b>                     | F: 5'-GGT CTC AAC CCC CAG CTA GT-3'     | 214 |
|                                 | R: 5'-GCC GAT GAT CTC TCT CAA GTG AT-3' |     |
| <b>IL-13</b>                    | F: 5'-AAC GGC AGC ATG GTA TGG AGT G-3'  | 215 |
|                                 | R: 5'-TGG GTC CTG TAG ATG GCA TTG C-3'  | 217 |
| <b>TNF-<math>\alpha</math></b>  | F: 5'-GGT GCC TAT GTC TCA GCC TCT T-3'  | 218 |
|                                 | R: 5'-GCC ATA GAA CTG ATG AGA GGG AG-3' |     |
| <b>IL-33</b>                    | F: 5'-CTA CTG CAT GAG ACT CCG TTC TG-3' | 219 |
|                                 | R: 5'-AGA ATC CCG TGG ATA GGC AGA G-3'  | 221 |

223  
224  
225  
226  
227  
228  
229  
230  
231

232 **Table S5. Information about antibodies used for western blot (WB), flow cytometry (FC), and**  
 233 **immunofluorescence staining (IF)**

| <b>Target</b>    | <b>Clone</b> | <b>Source</b>     | <b>Use</b>    |
|------------------|--------------|-------------------|---------------|
| 6xHis-HRP        | MAB050H      | R&D Systems       | ELISA (1:250) |
| $\beta$ -actin   | 2F1-1        | BioLegend         | WB (1:1000)   |
| CD107a           | 1D4B         | BioLegend         | FC (1:50)     |
| c-Kit            | 2B8          | BioLegend         | FC (1:100)    |
| DCIR             | MAB2617 (ms) | Novus Biologicals | IF (1:200)    |
|                  | 9E8 (ms)     | Invitrogen        | FC (1:100)    |
|                  | MAB1748 (hm) | Novus Biologicals | WB (1:500)    |
| Fc $\epsilon$ RI | MAR-1        | BioLegend         | FC (1:100)    |
| Ox-CaMKII        | 07-1387      | Millipore Sigma   | IF (1:200)    |
| Tryptase         | AF1937 (ms)  | R&D Systems       | IF (1:200)    |
|                  | 725445 (hm)  | R&D Systems       | IF (1:200)    |

234

235

236

237

238

239

240

241 **REFERENCES**

- 242 1. Alphonse MP, Rubens JH, Ortines RV, Orlando NA, Patel AM, Dikeman D, et al. Pan-caspase inhibition as a  
243 potential host-directed immunotherapy against MRSA and other bacterial skin infections. *Science*  
244 *translational medicine*. 2021;13(601).
- 245 2. Hu X, Shen Y, Zhao Y, Wang J, Zhang X, Tu W, et al. Epithelial Aryl Hydrocarbon Receptor Protects From  
246 Mucus Production by Inhibiting ROS-Triggered NLRP3 Inflammasome in Asthma. 2021;12(4810).
- 247 3. Zhang Y, Do DC, Hu X, Wang J, Zhao Y, Mishra S, et al. CaMKII oxidation regulates cockroach allergen-  
248 induced mitophagy in asthma. *The Journal of allergy and clinical immunology*. 2021;147(4):1464-77 e11.  
249

A

Th1/Th2/Th17 and mast cells

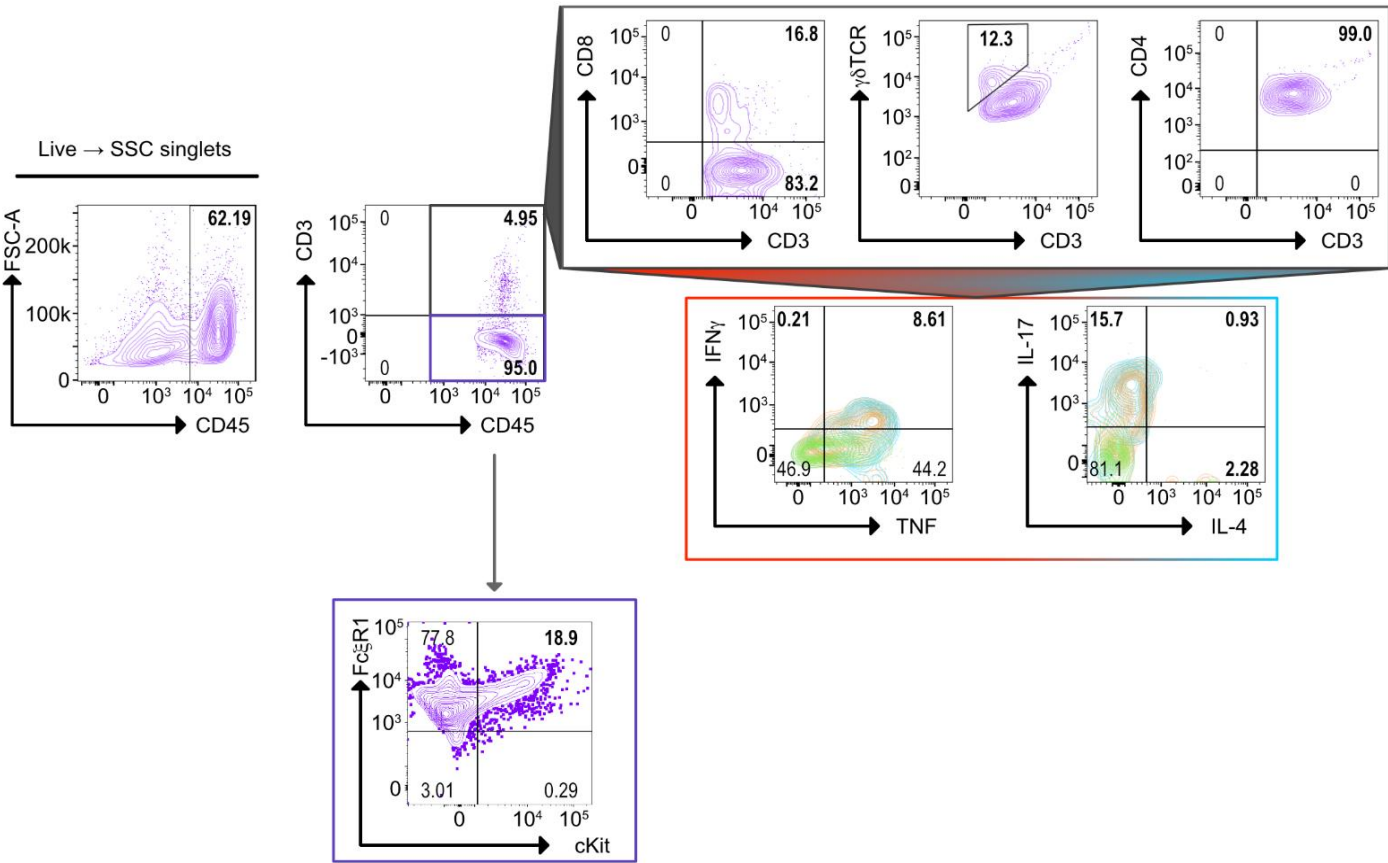

B

ILC2

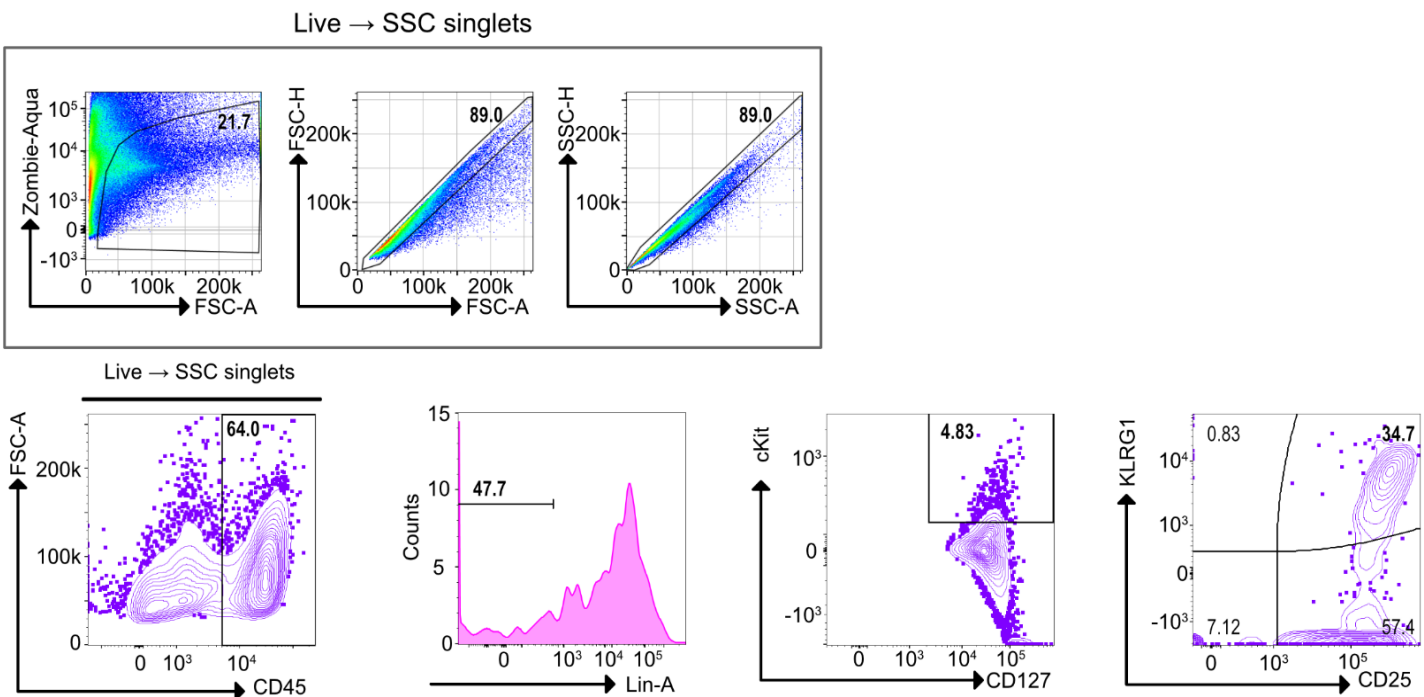

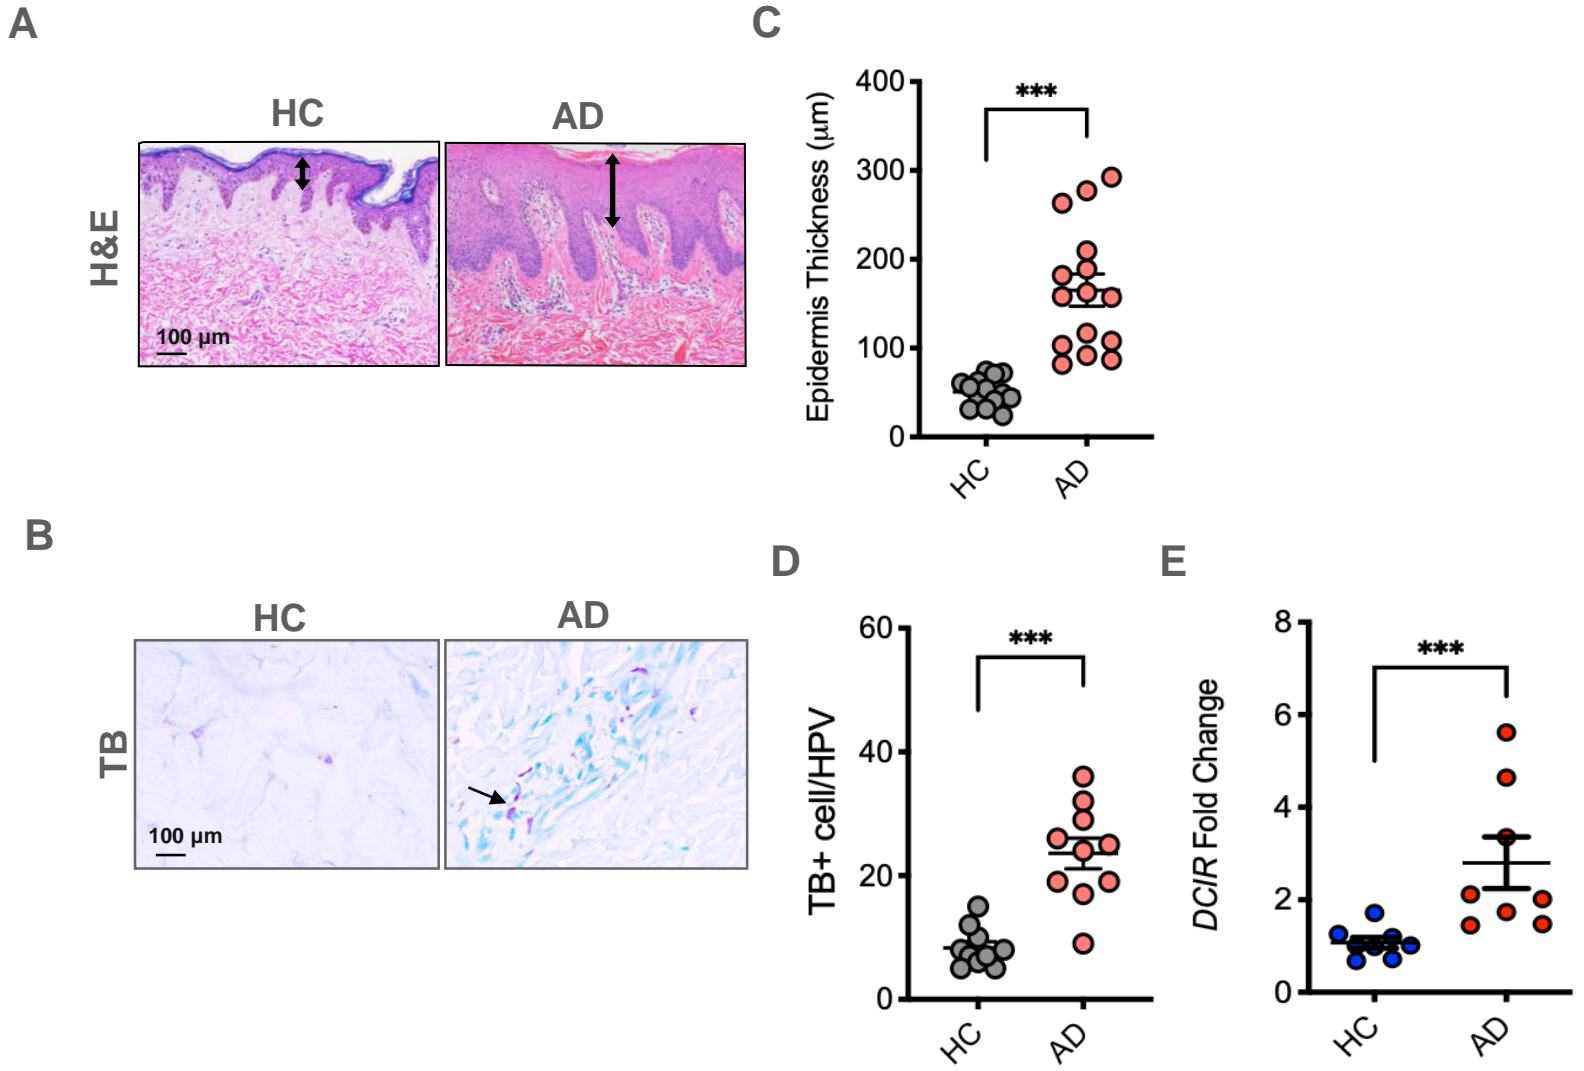

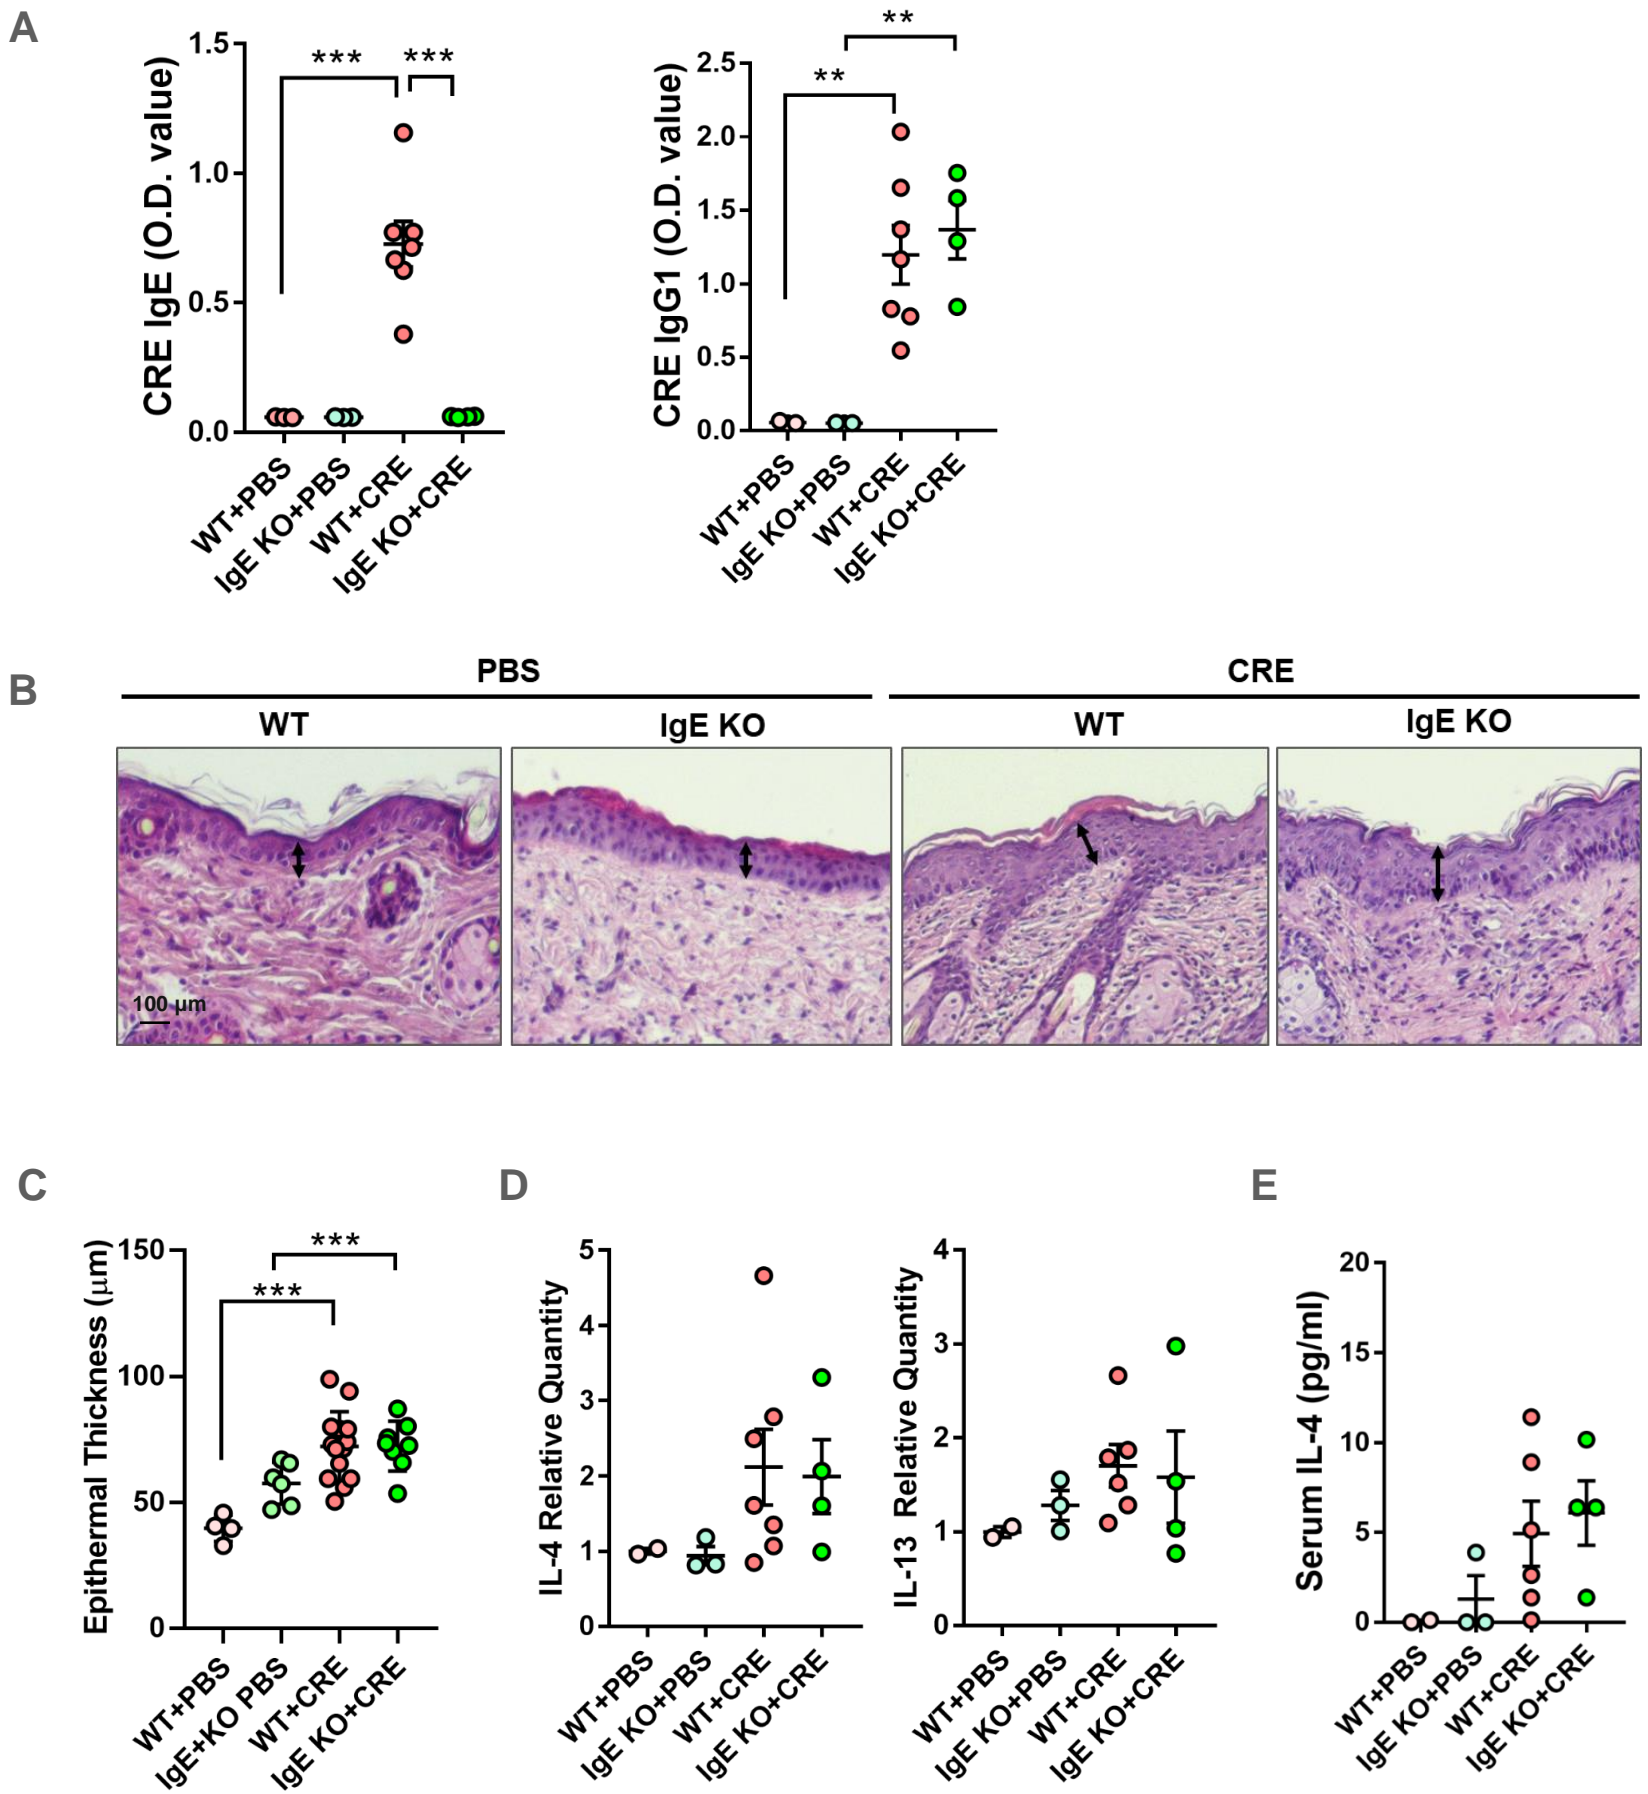

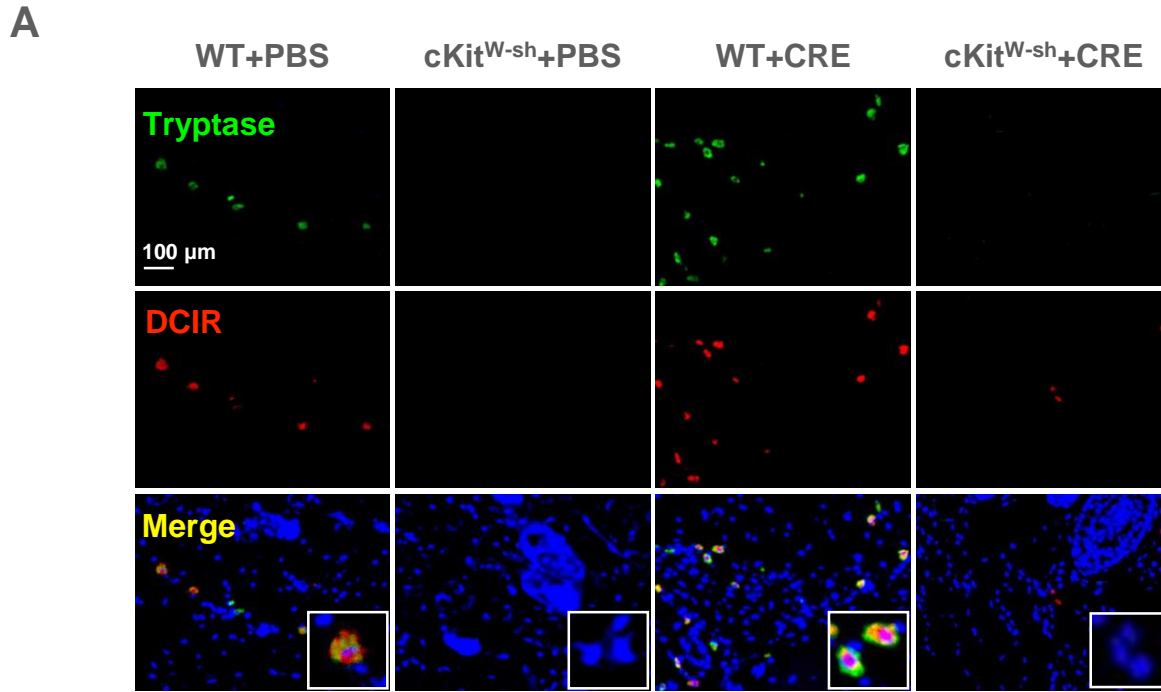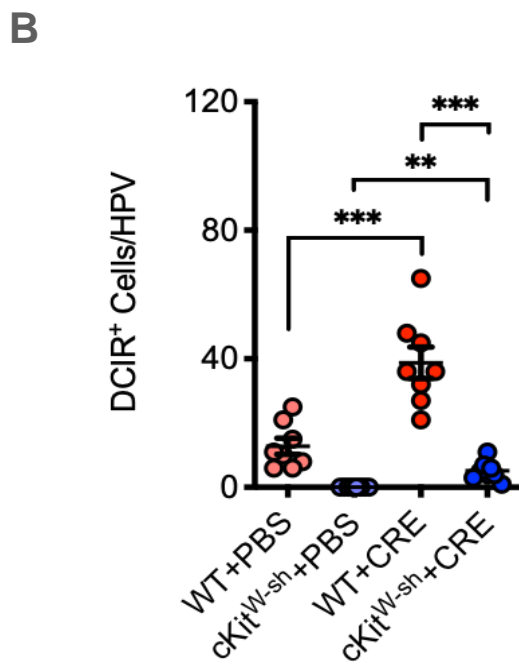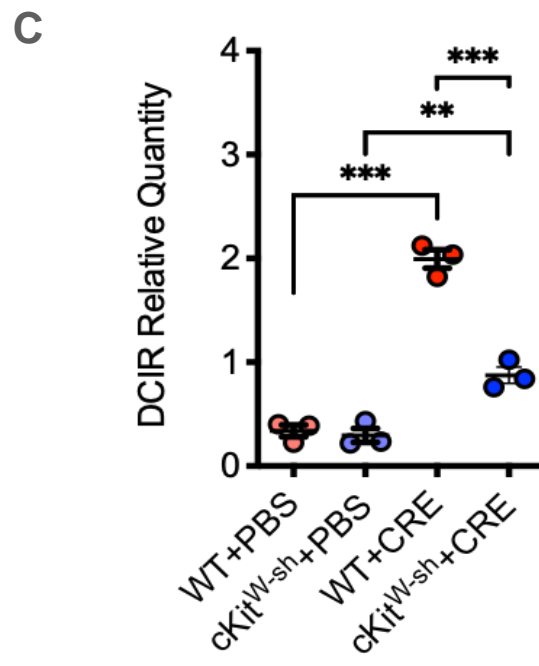



A

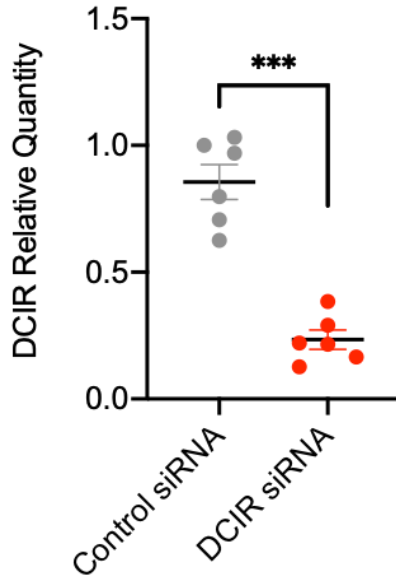

B

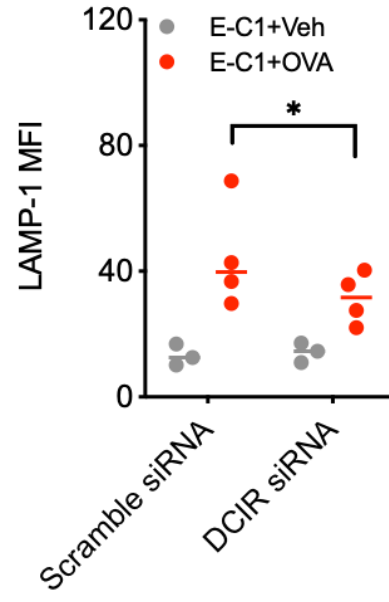

C

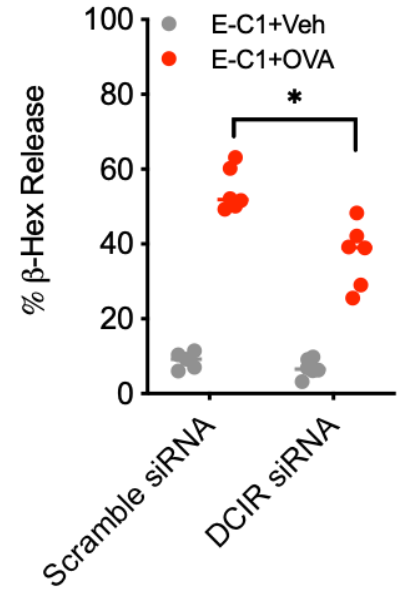

D

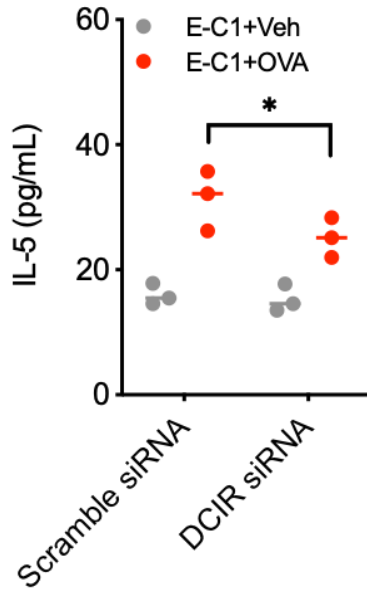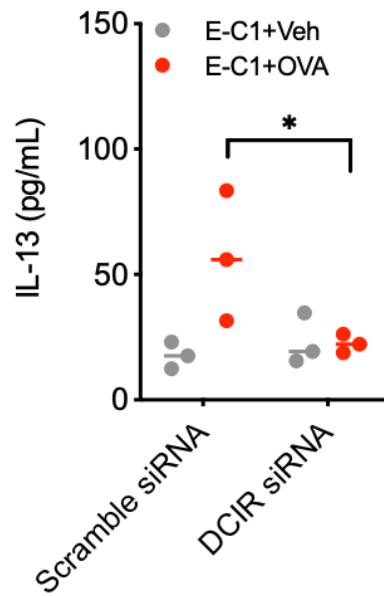

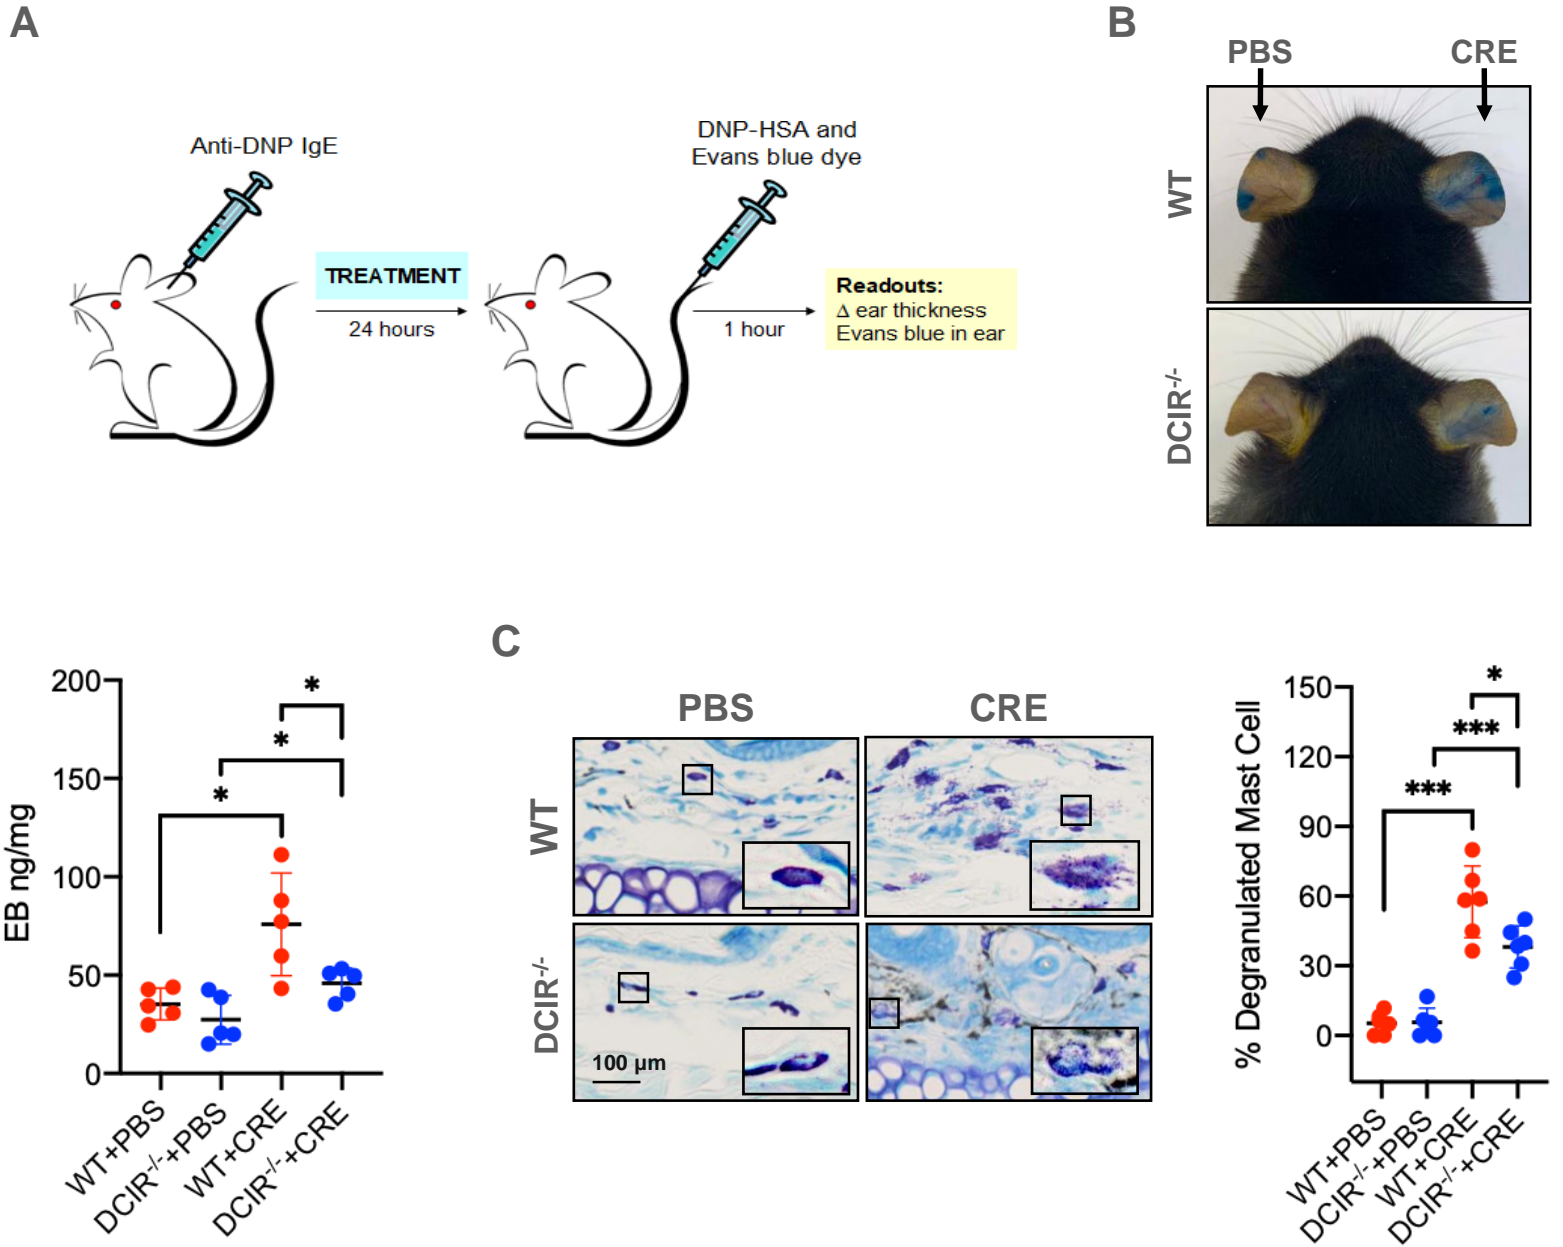

A

Phosphorylated NLS: less active  
Phosphorylated NES: more active

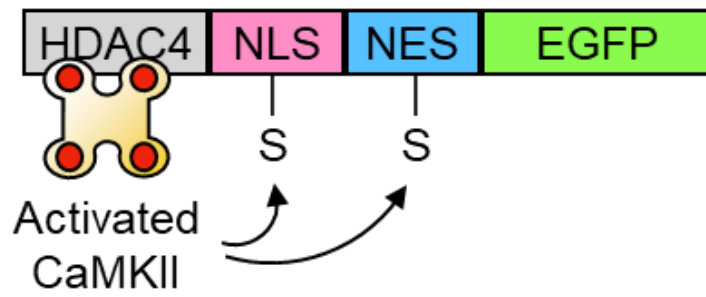

B

BMMC

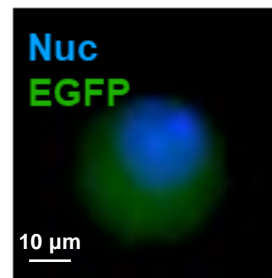

Supplement: jciinsight-7-152559-s170.pdf [file jciinsight-7-152559-s170.pdf]
